# Supplementary material for: Facile and efficient gold-catalyzed aerobic oxidative esterification of activated alcohols
Source: Royal Society of Chemistry journal article supplement (doi:10.1039/c3gc42075b), 2013-12-04

## **SUPPORTING INFORMATION**

### **Facile and Efficient Gold-catalyzed Aerobic Oxidative Esterification of Alcohols**

Lianyue Wang, Jun Li, Wen Dai, Ying Lv, Yi Zhang and Shuang Gao\*

E-mail: sgao@dicp.ac.cn

Fax: 0086+411-84379248; Tel: 0086+411-84379248

#### **Table of Contents**

**Characterization of catalyst**

**Recycling catalyst**

**Copies of NMR Spectra for the Isolated Products**

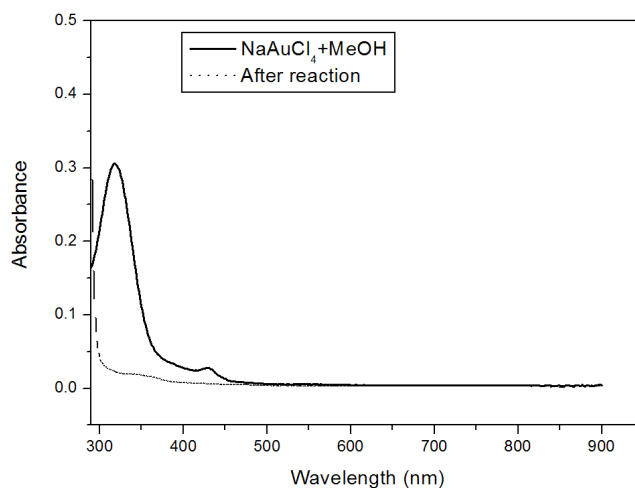

**Figure S1.** UV-vis spectrum of NaAuCl<sub>4</sub> + MeOH and after reaction

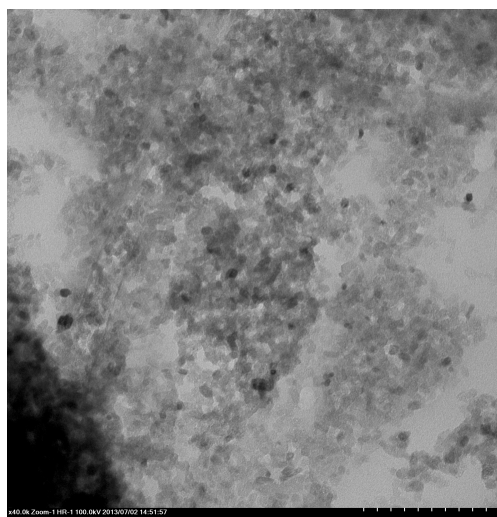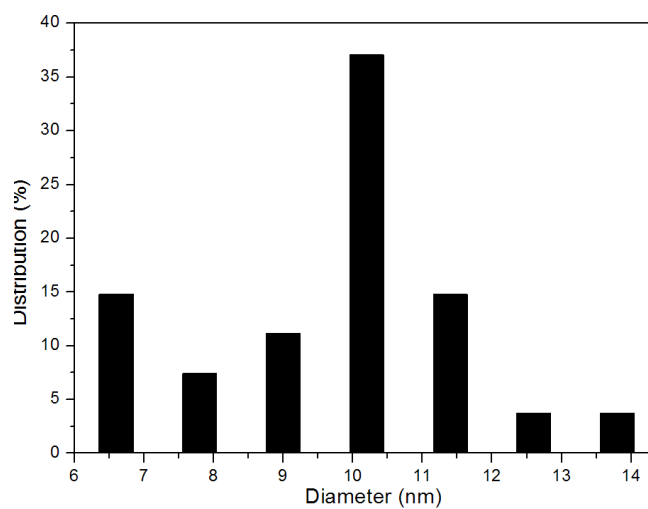

**Figure S2.** TEM image of the recovered catalyst (Au-K<sub>2</sub>CO<sub>3</sub>)

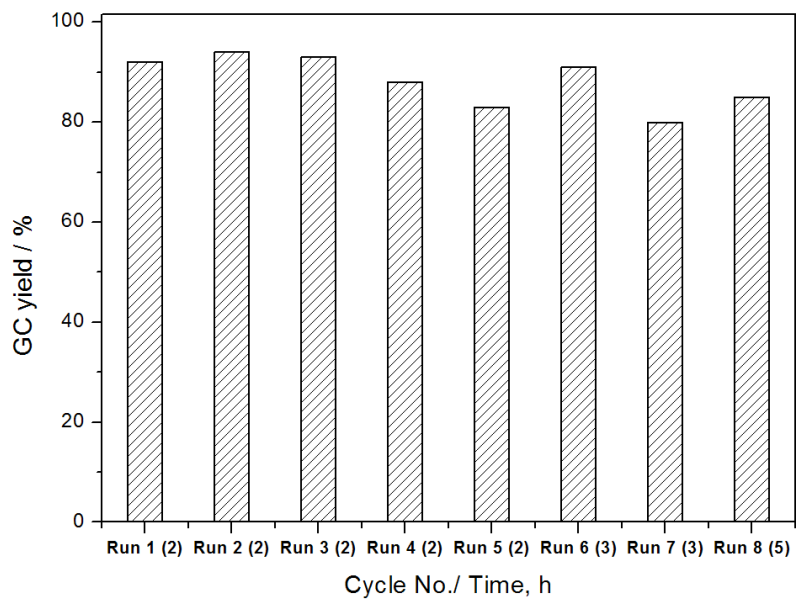

**Figure S3.** Recyclability of Au catalyst in the oxidation of benzyl alcohol

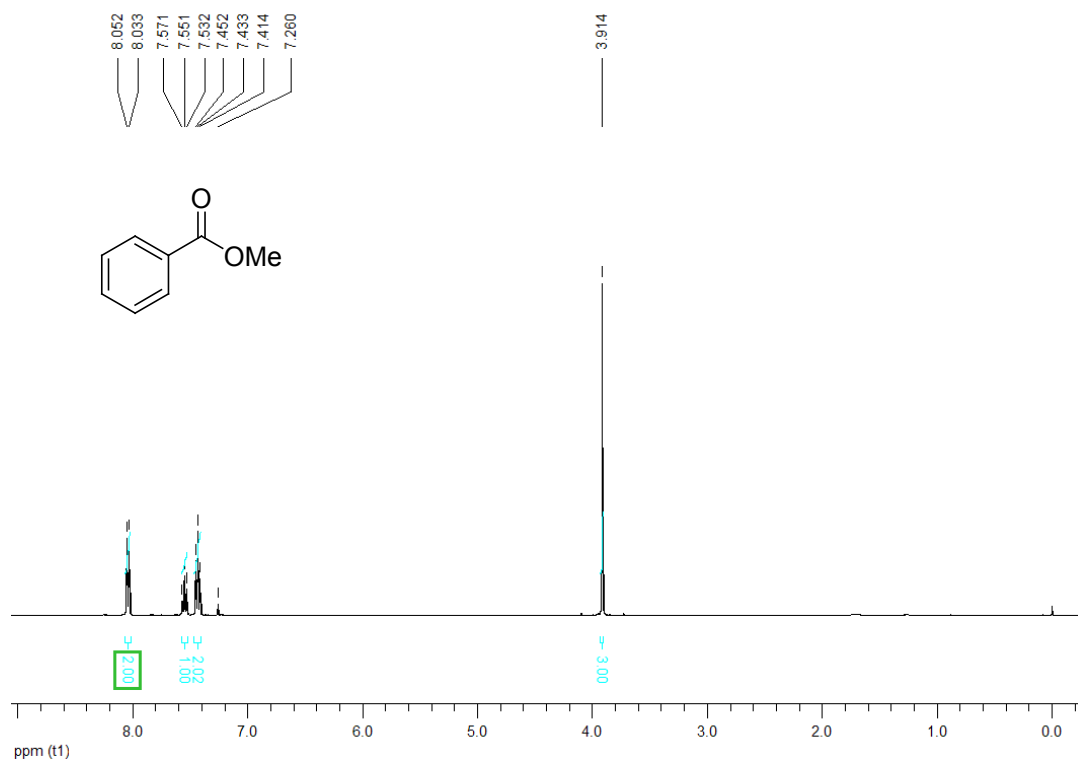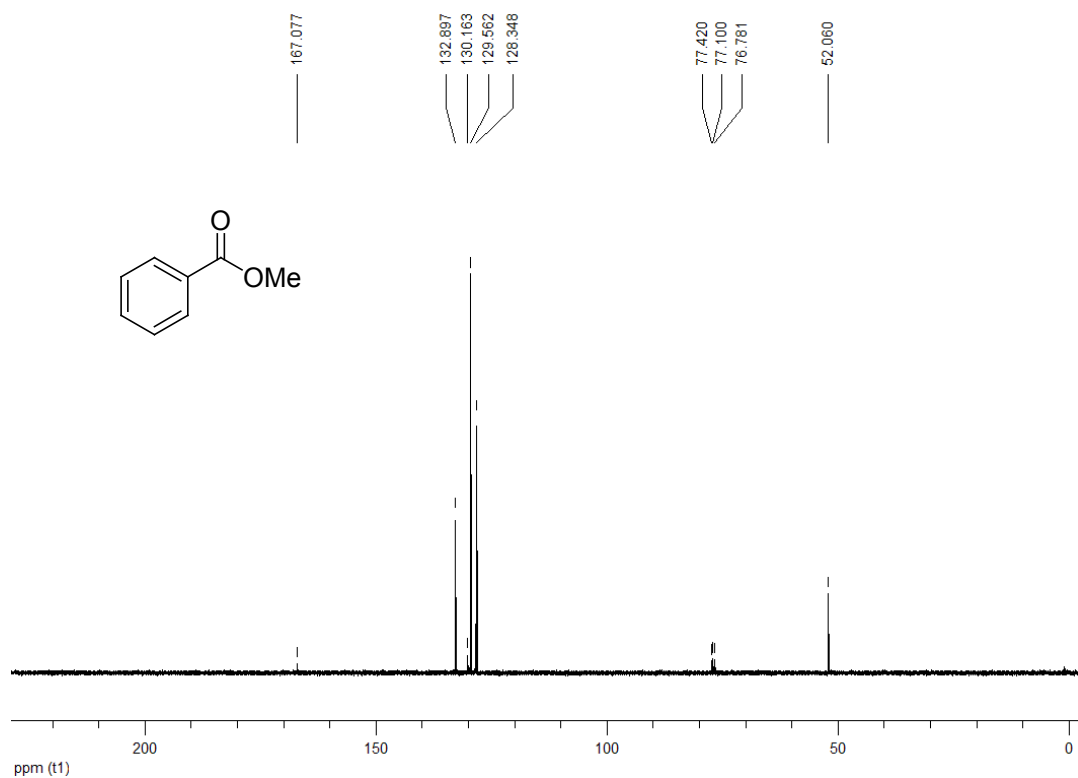

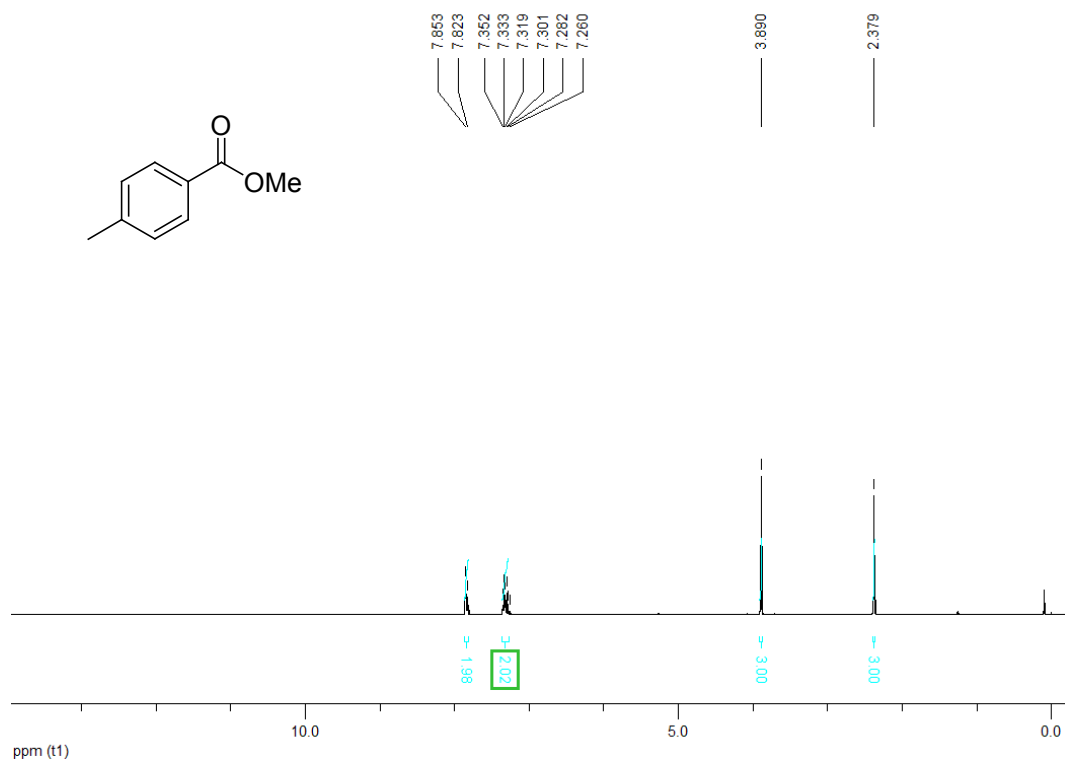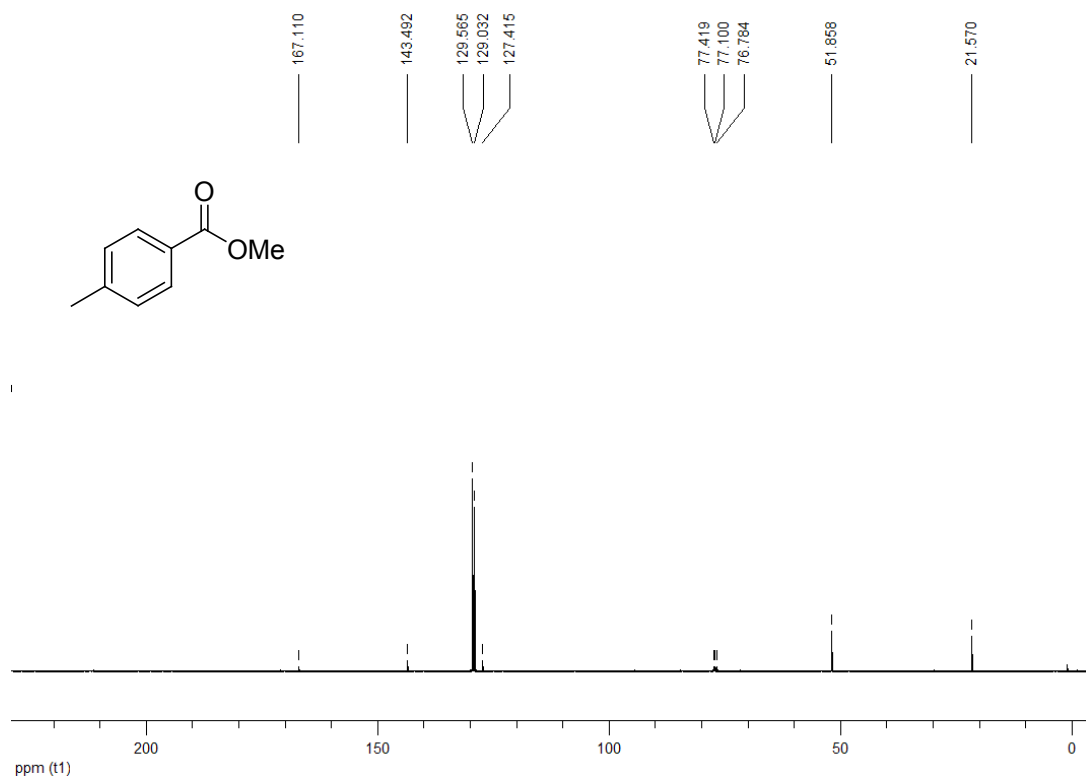

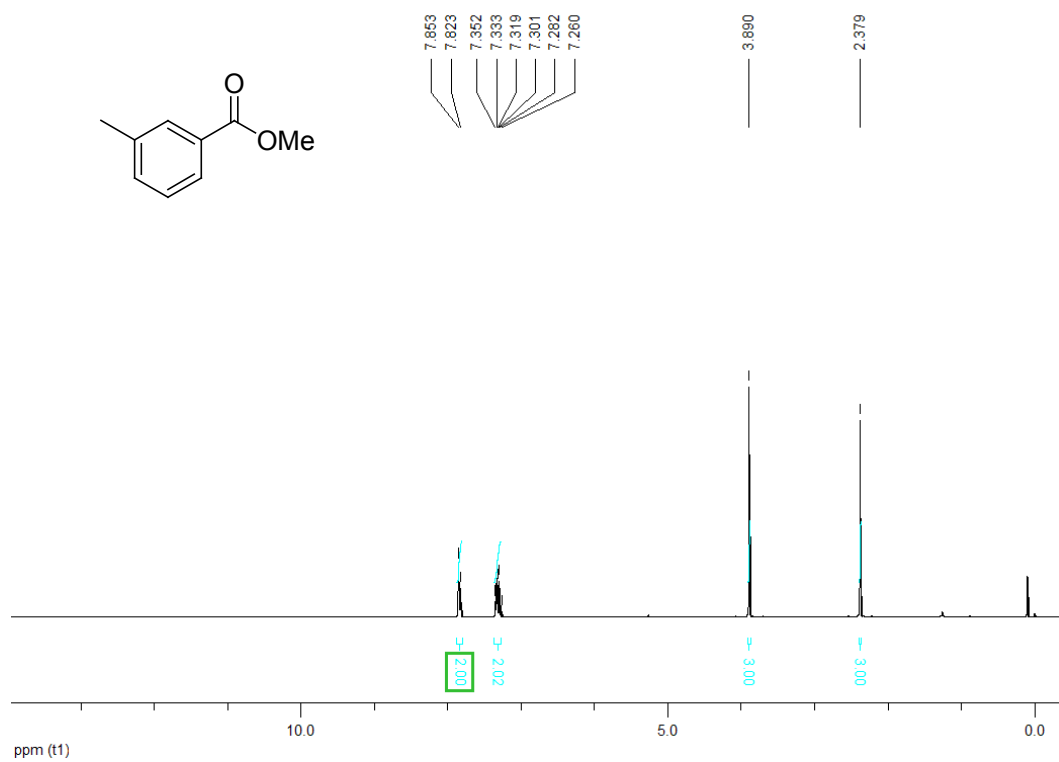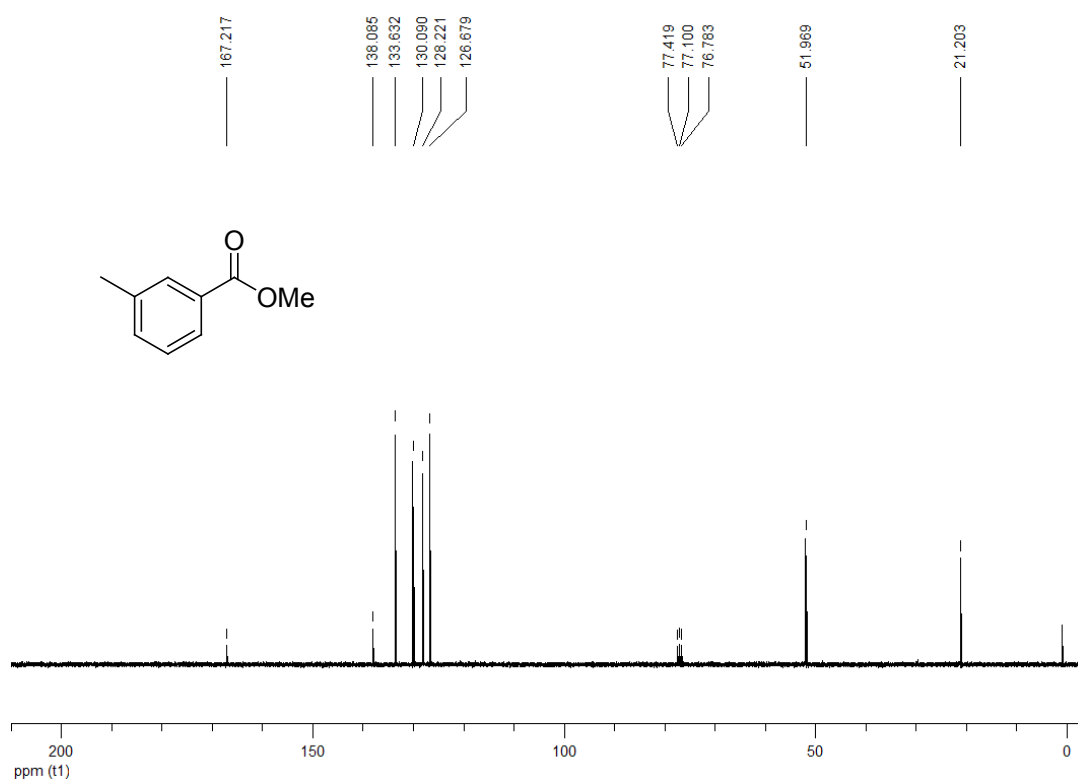

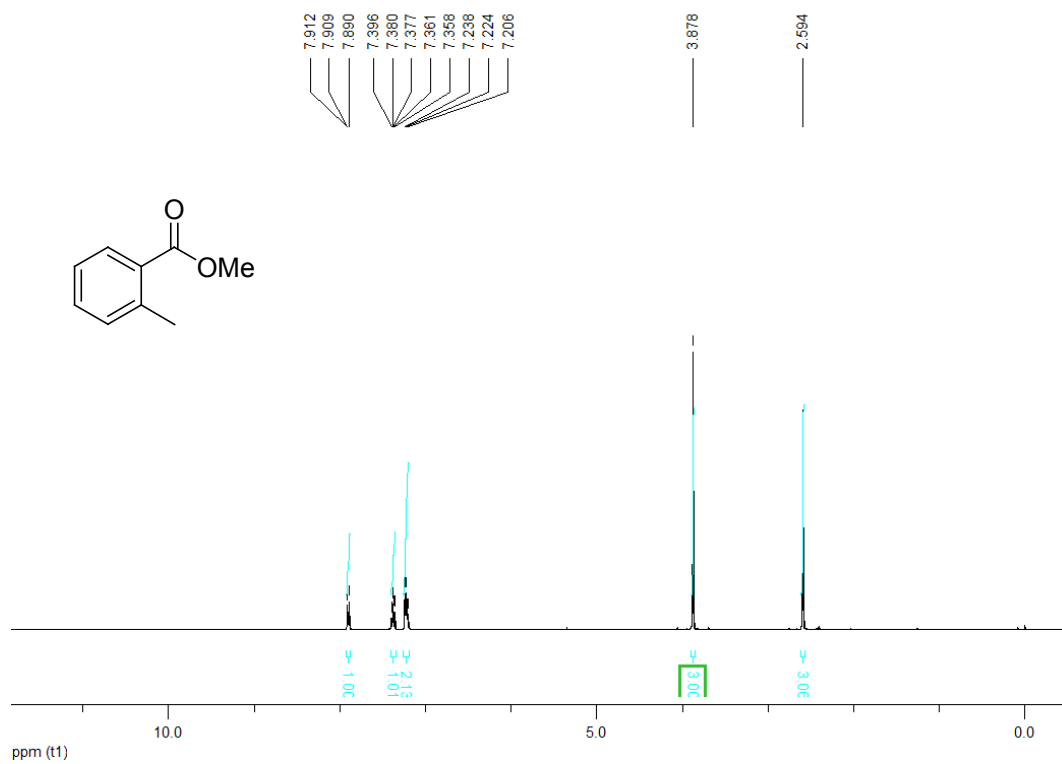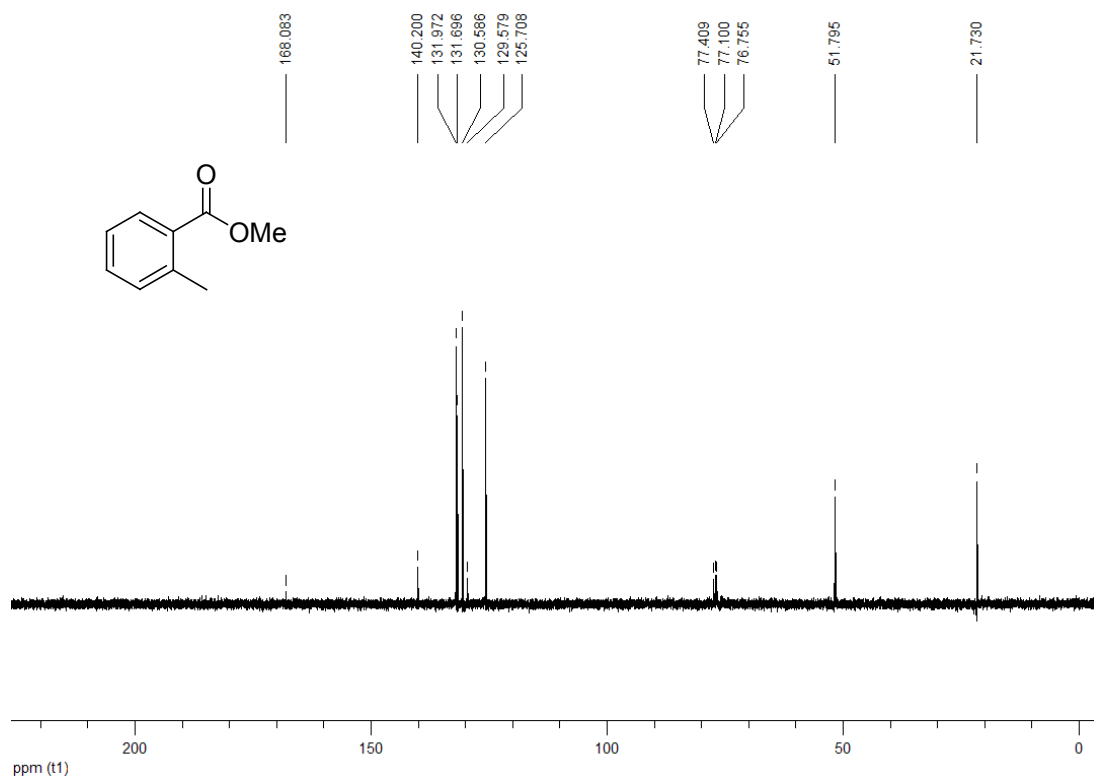

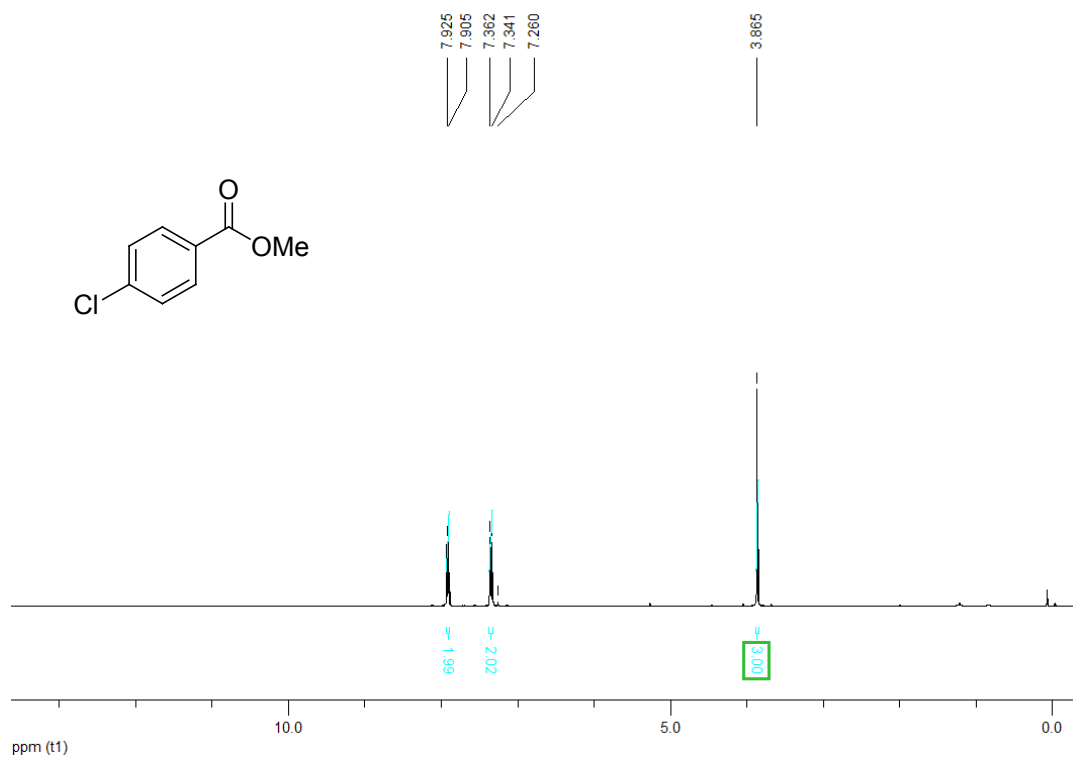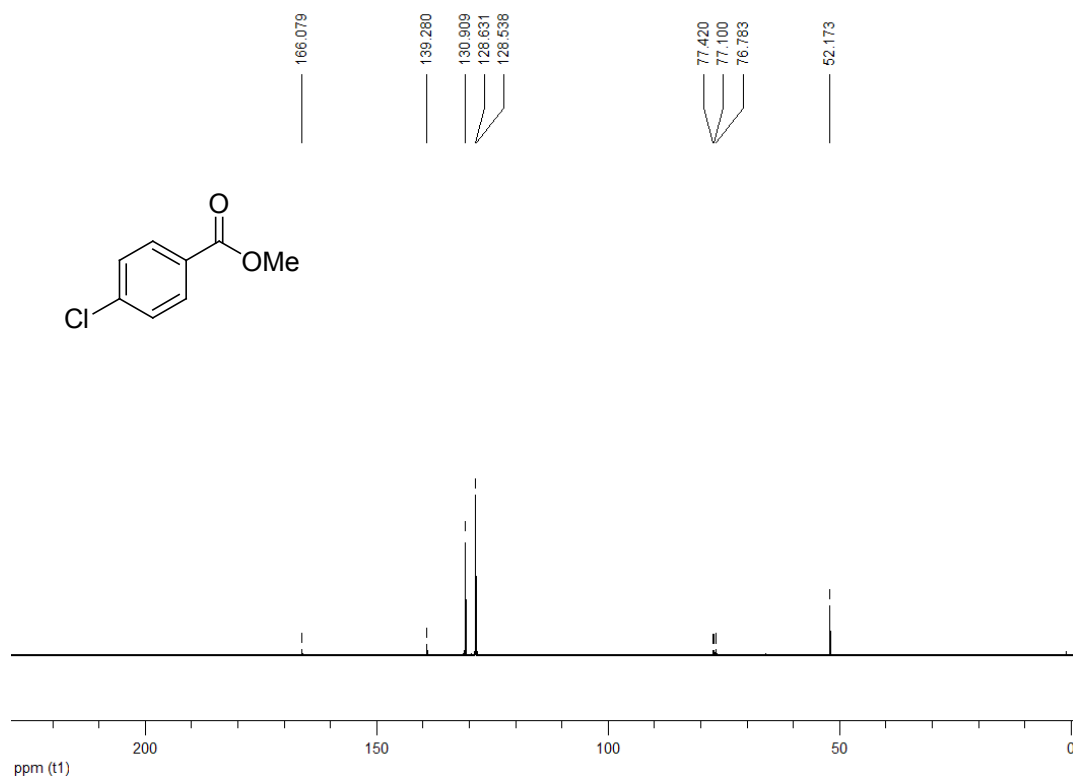



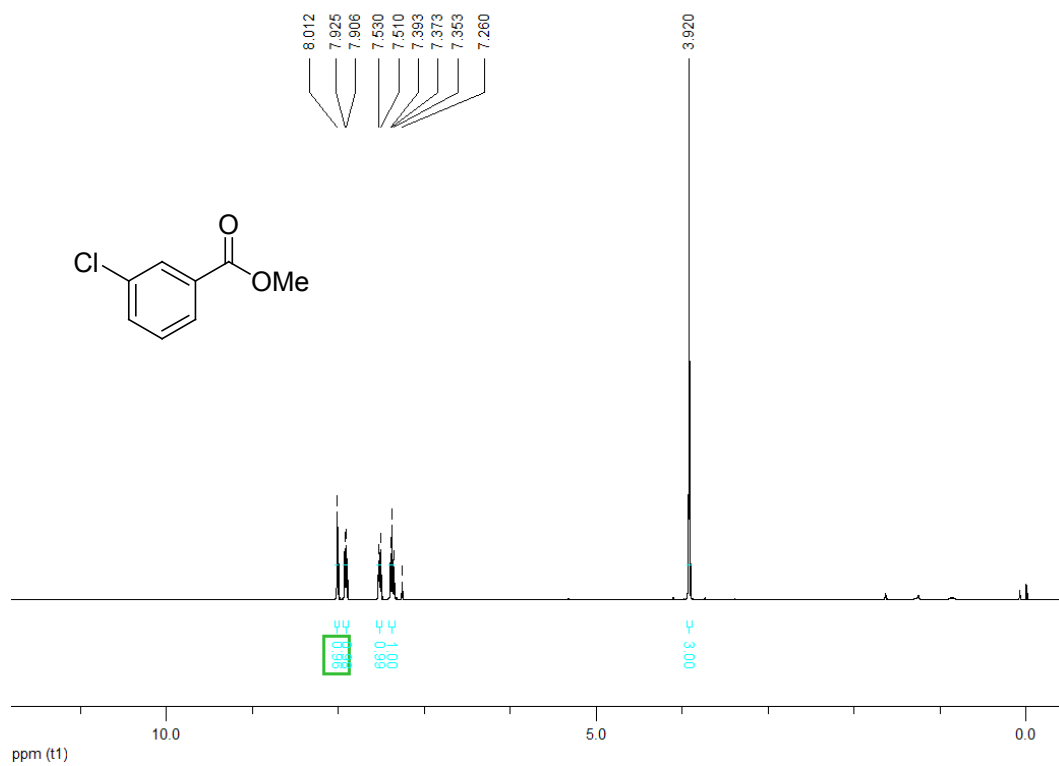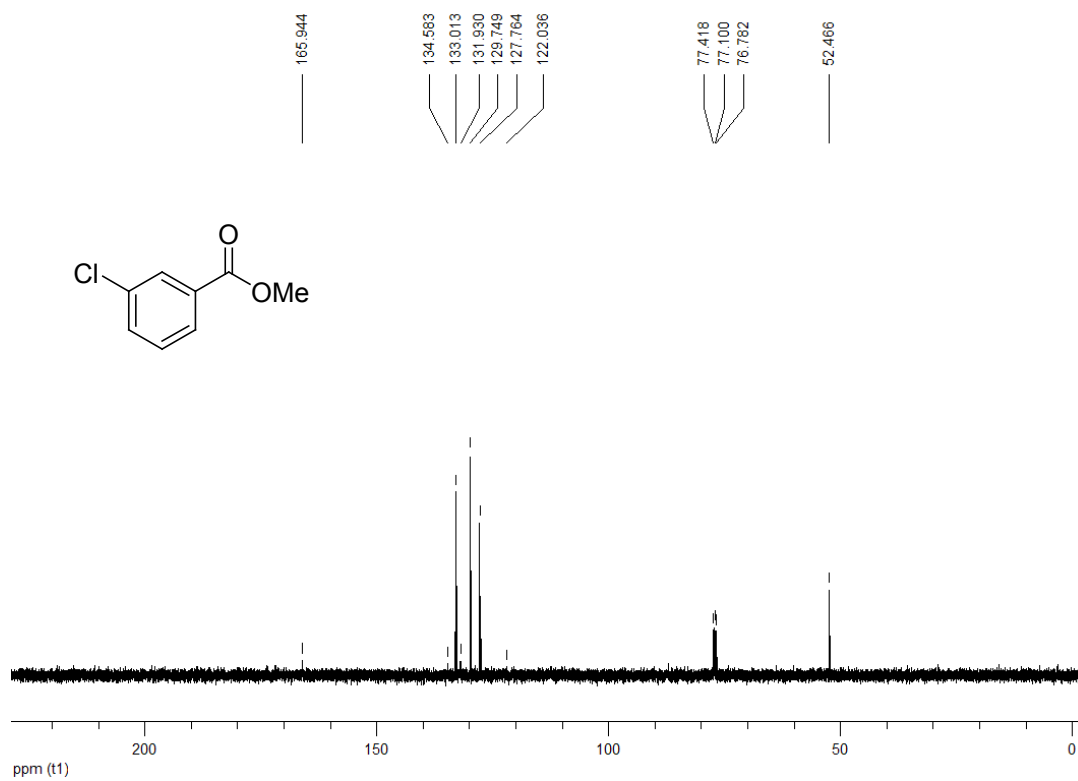

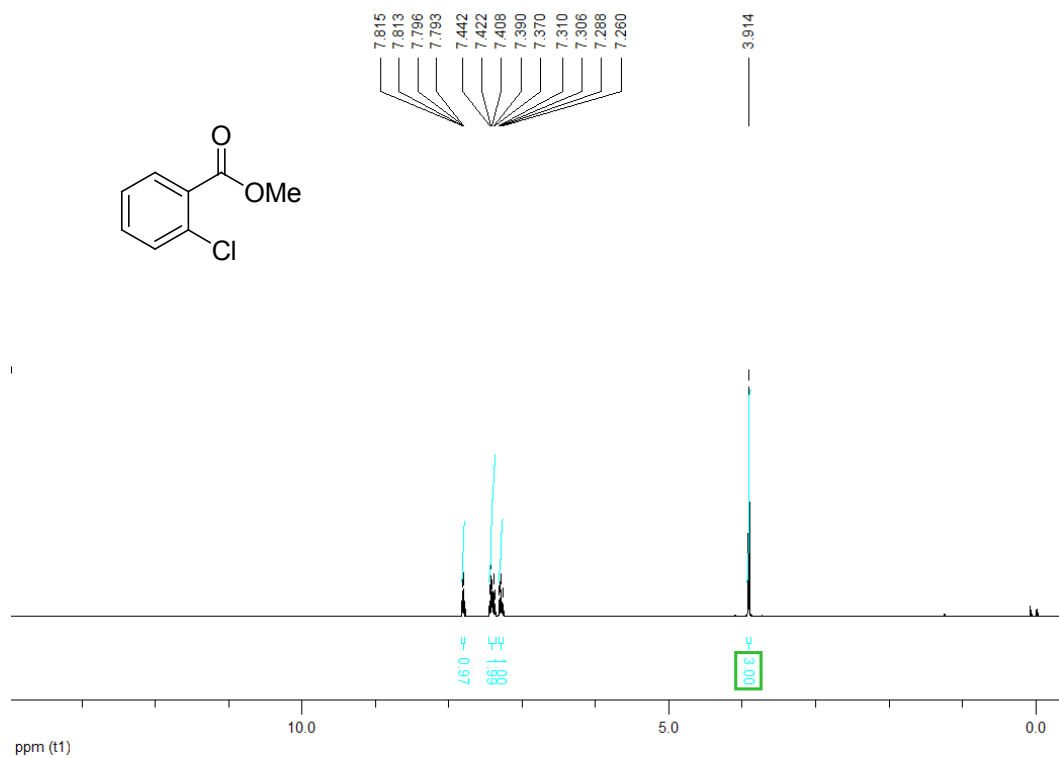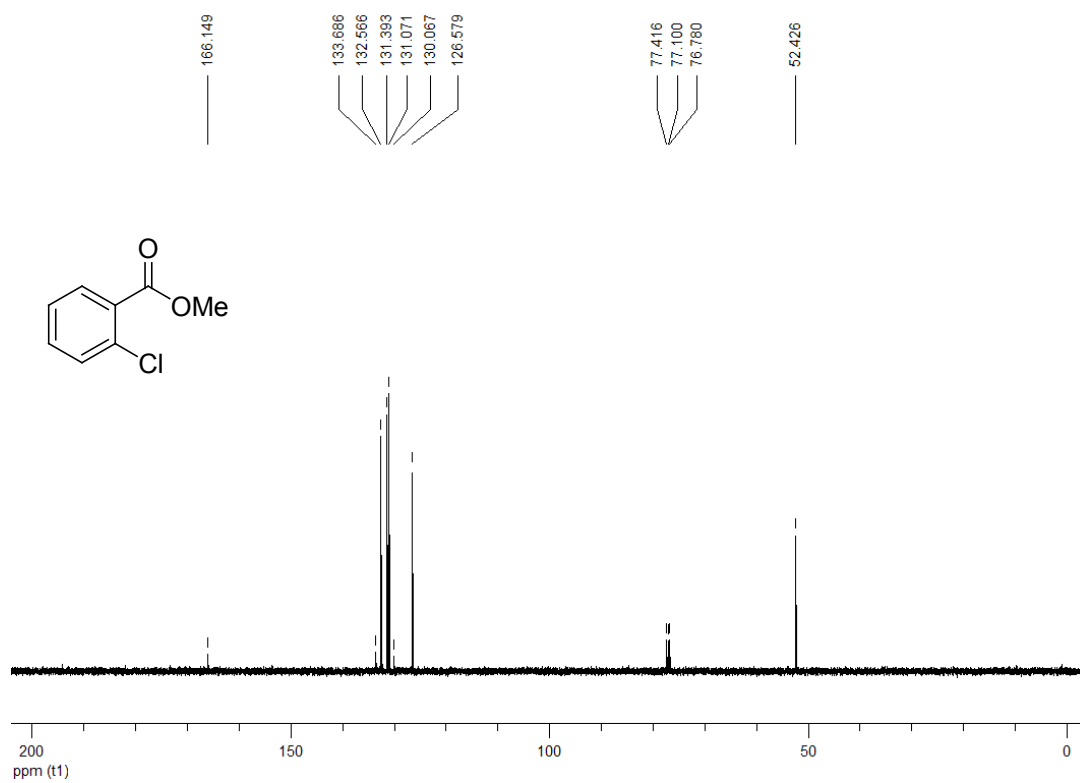

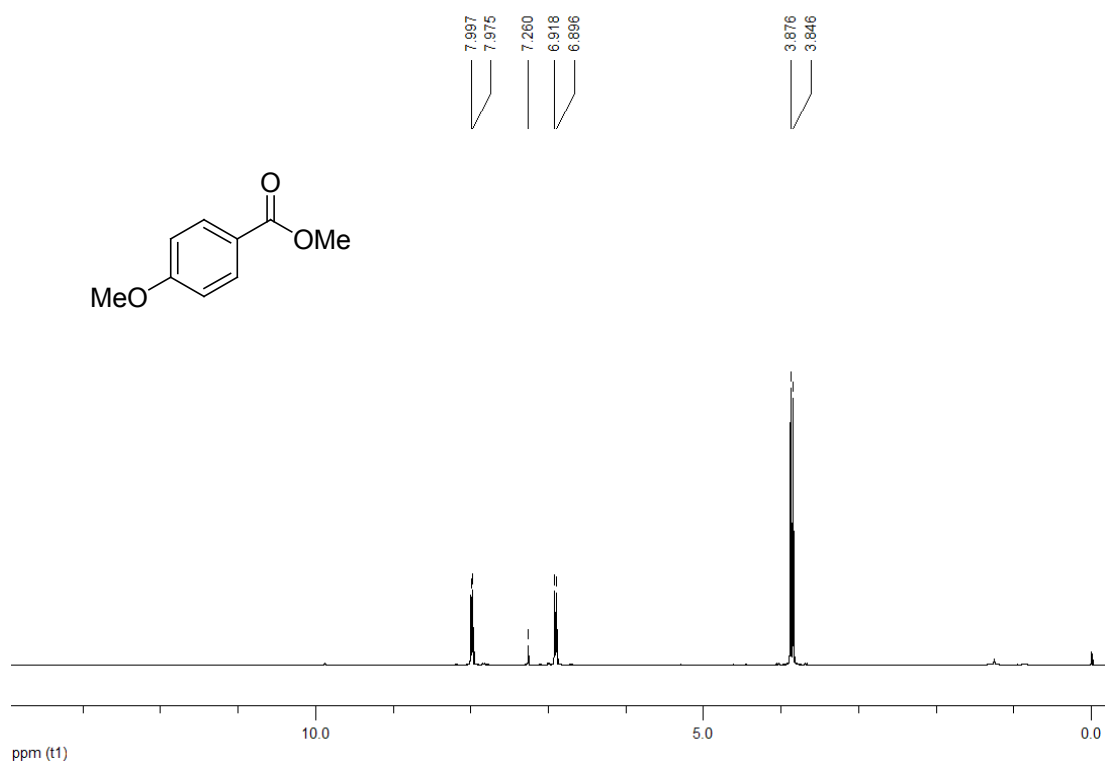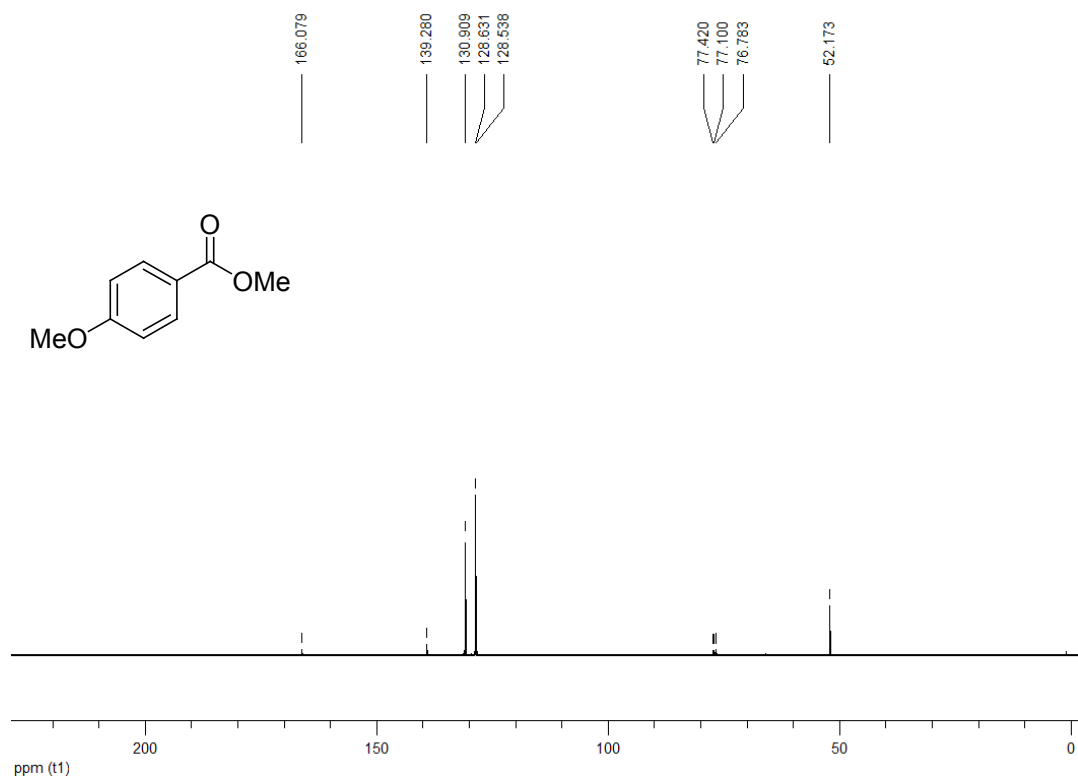

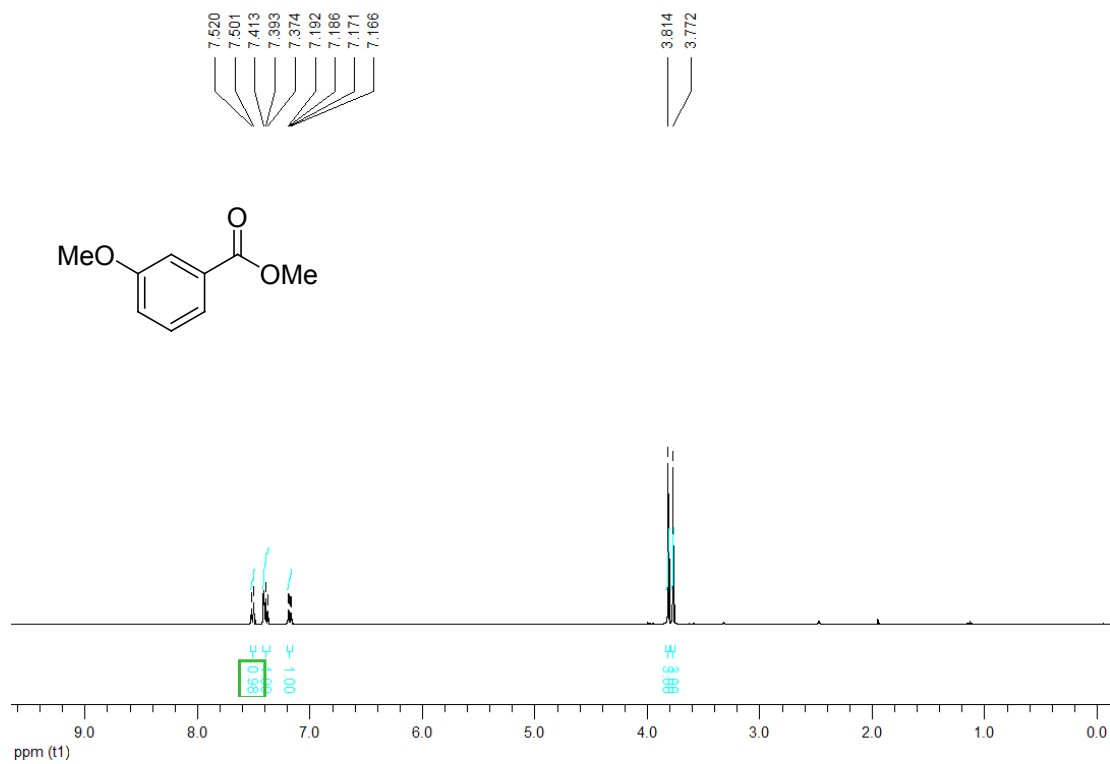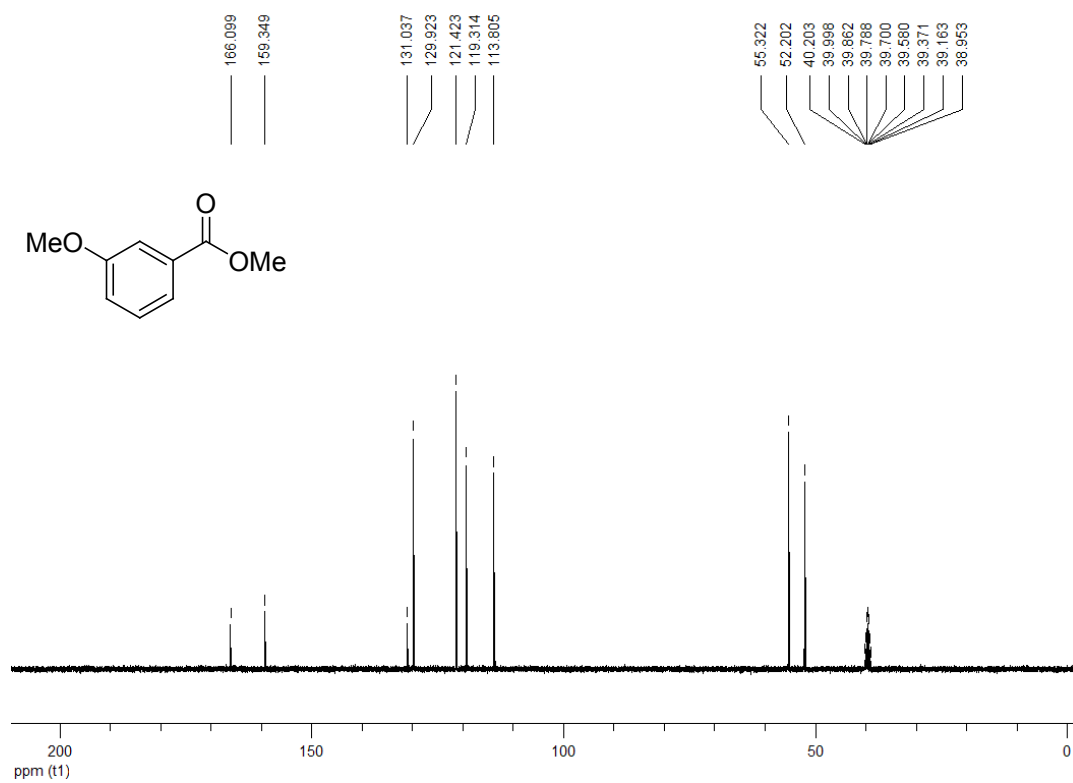

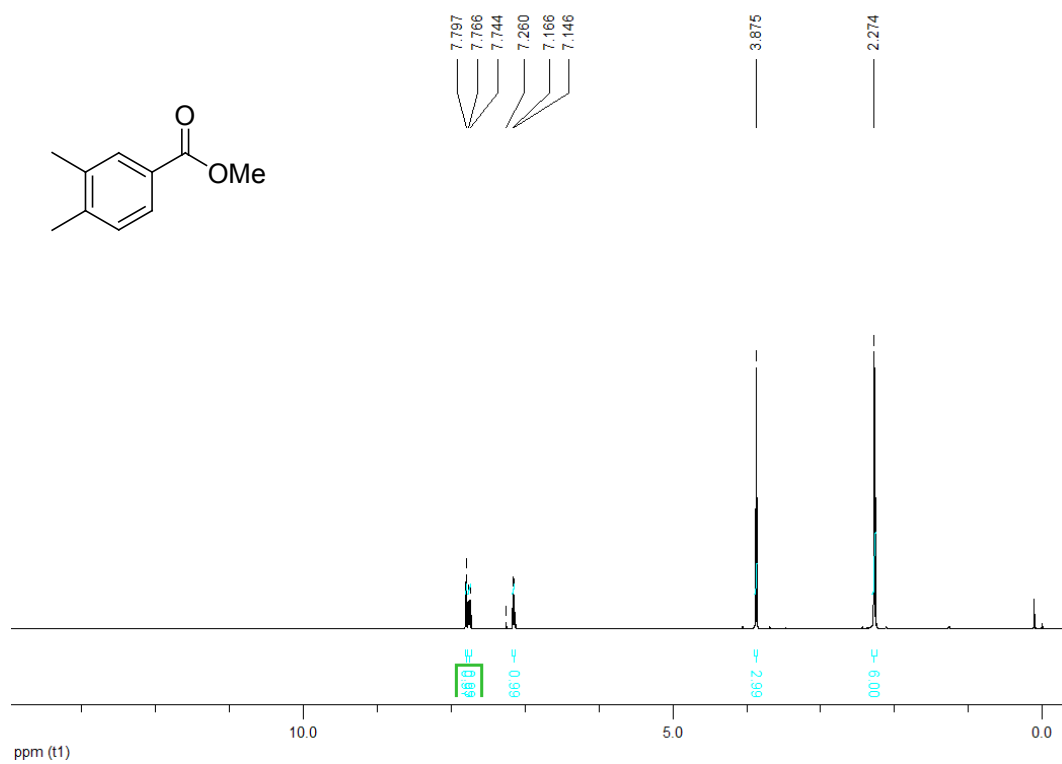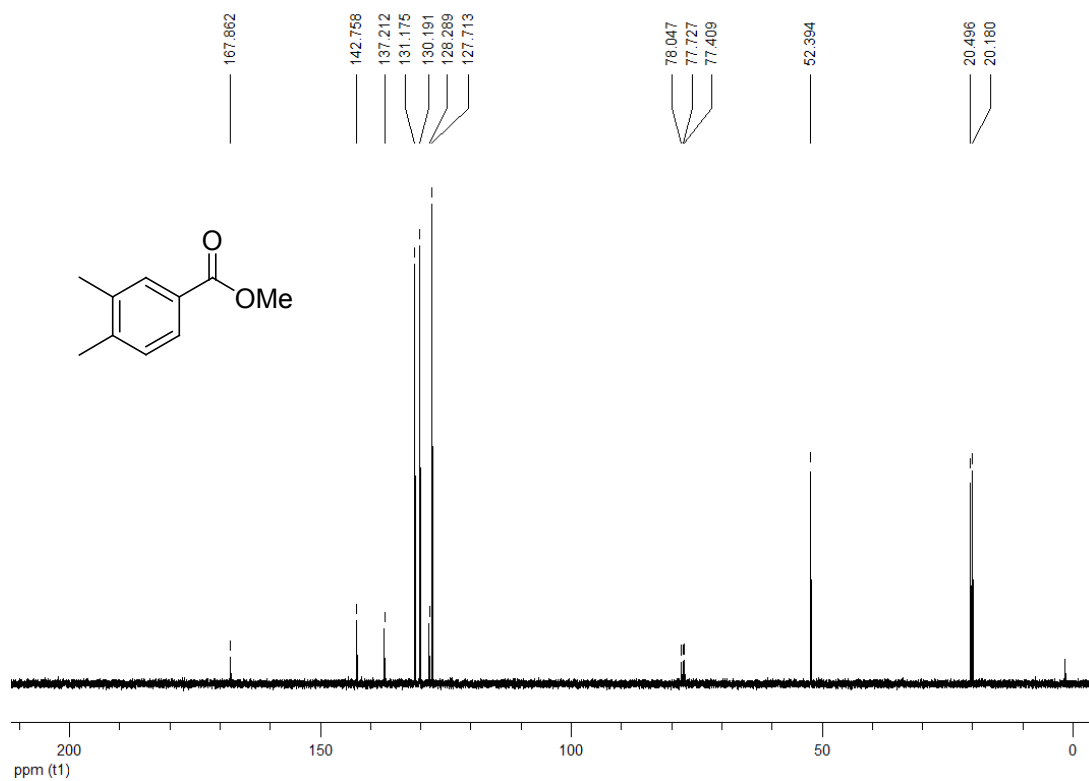

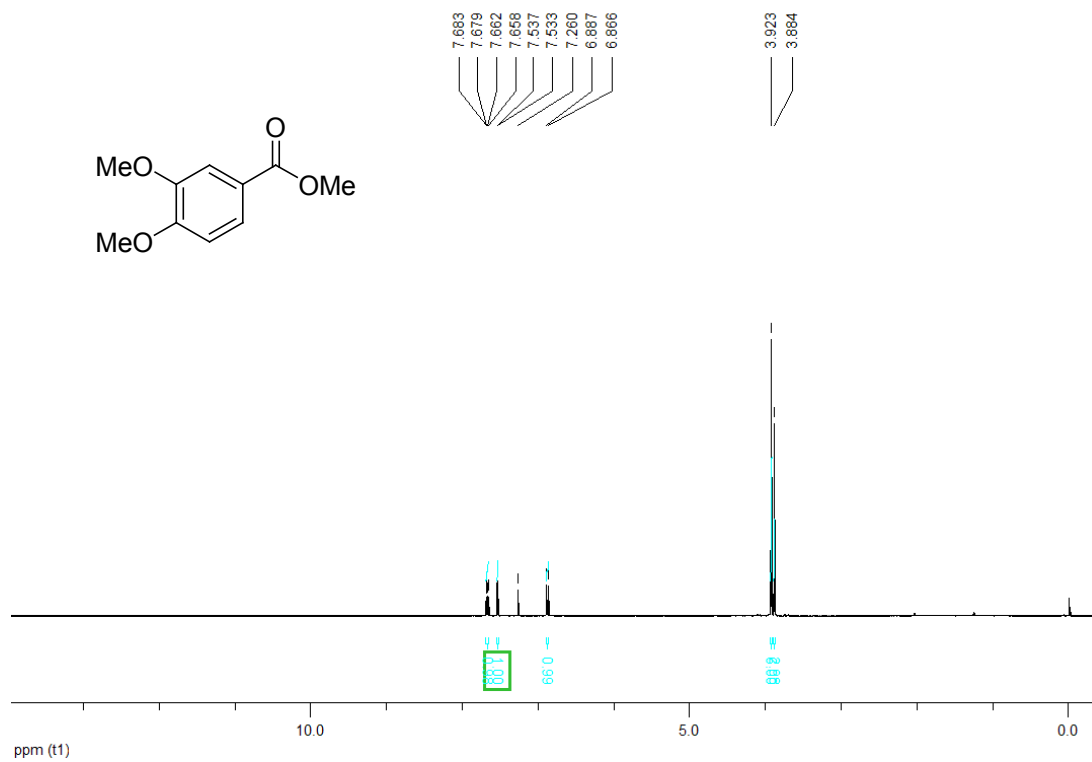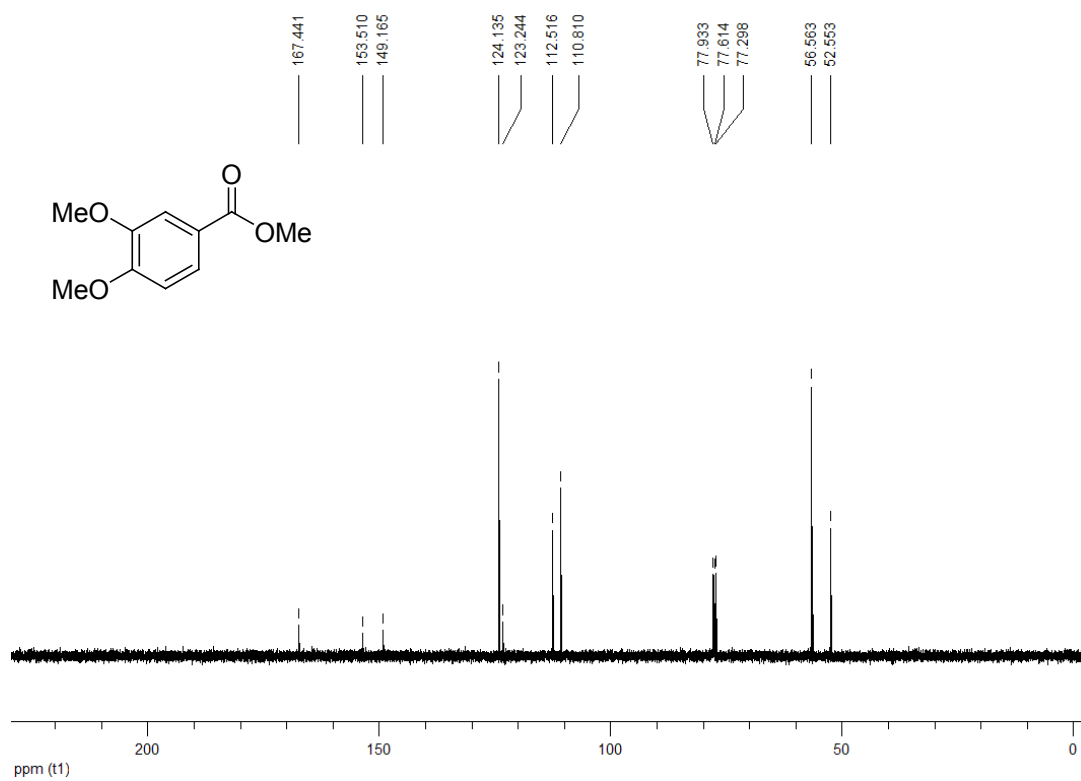

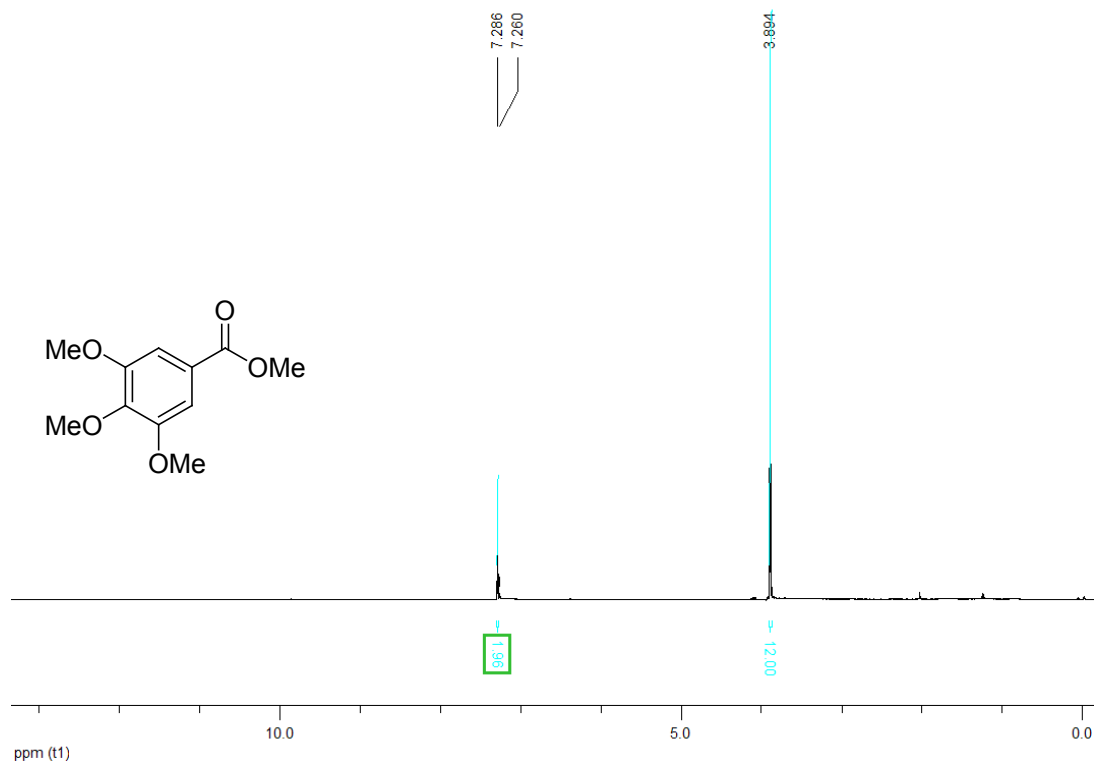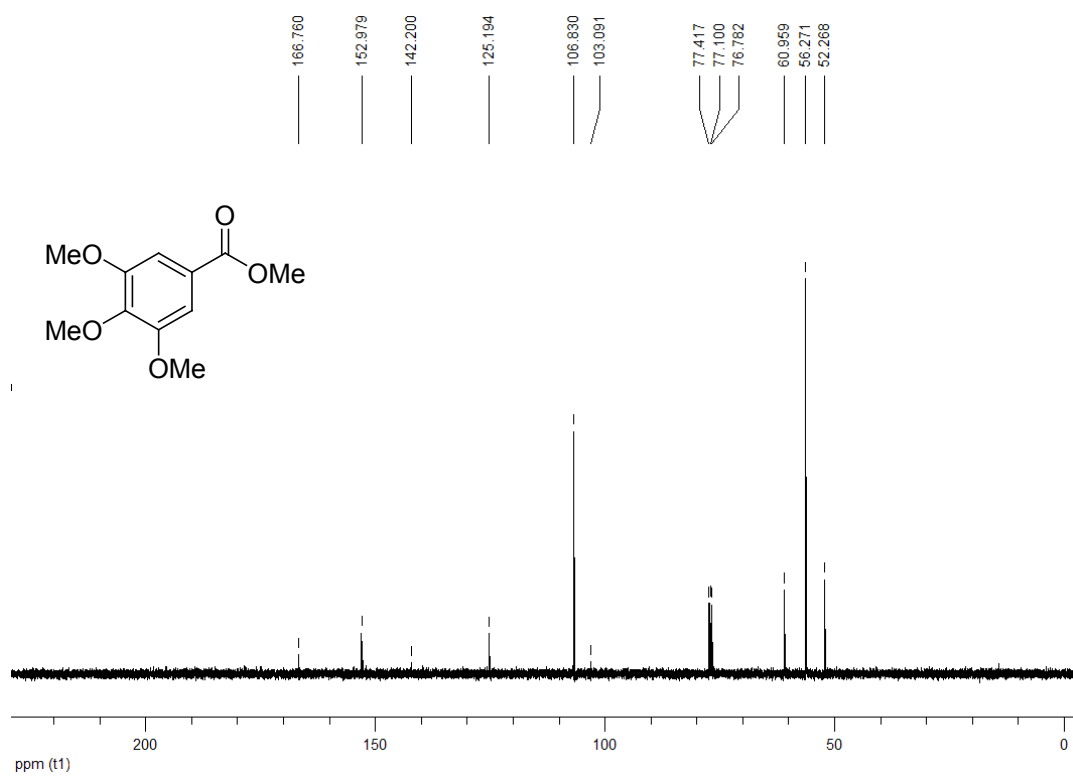

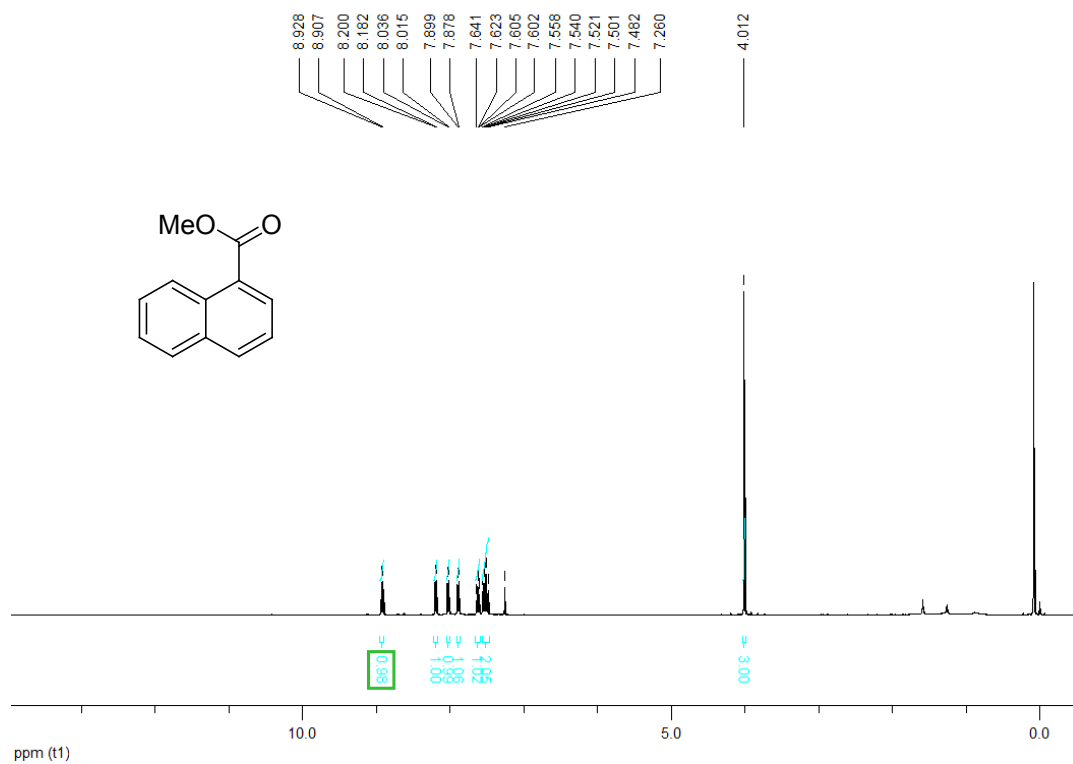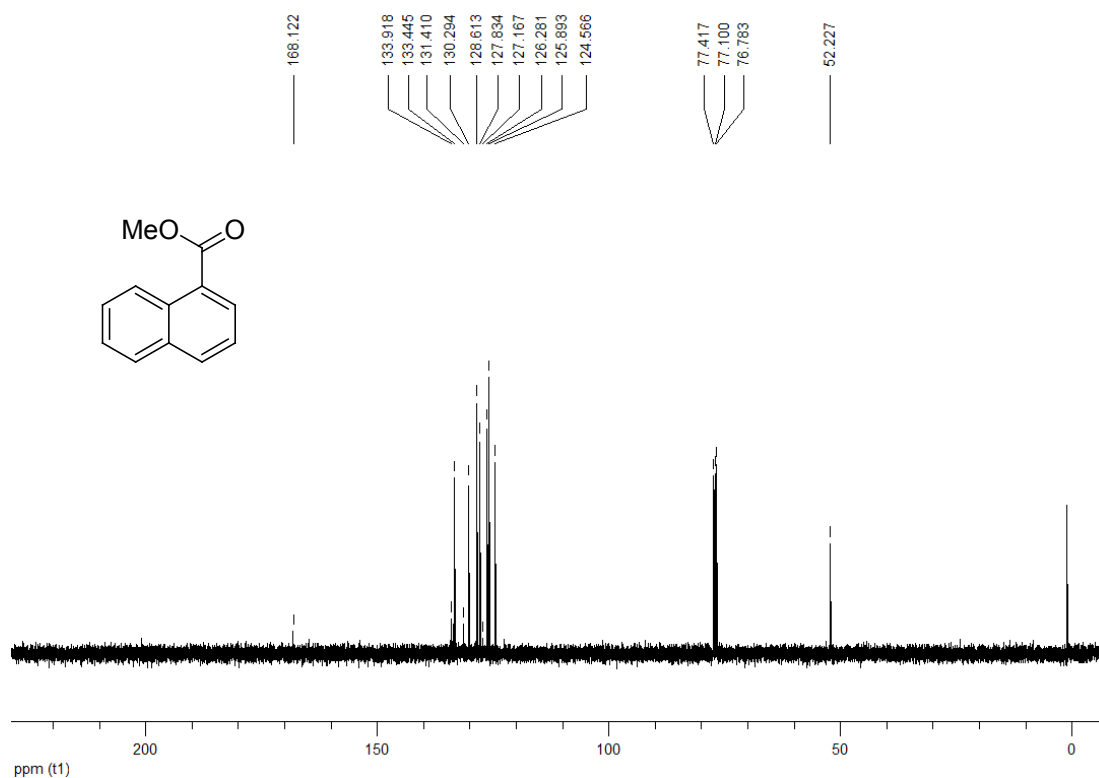



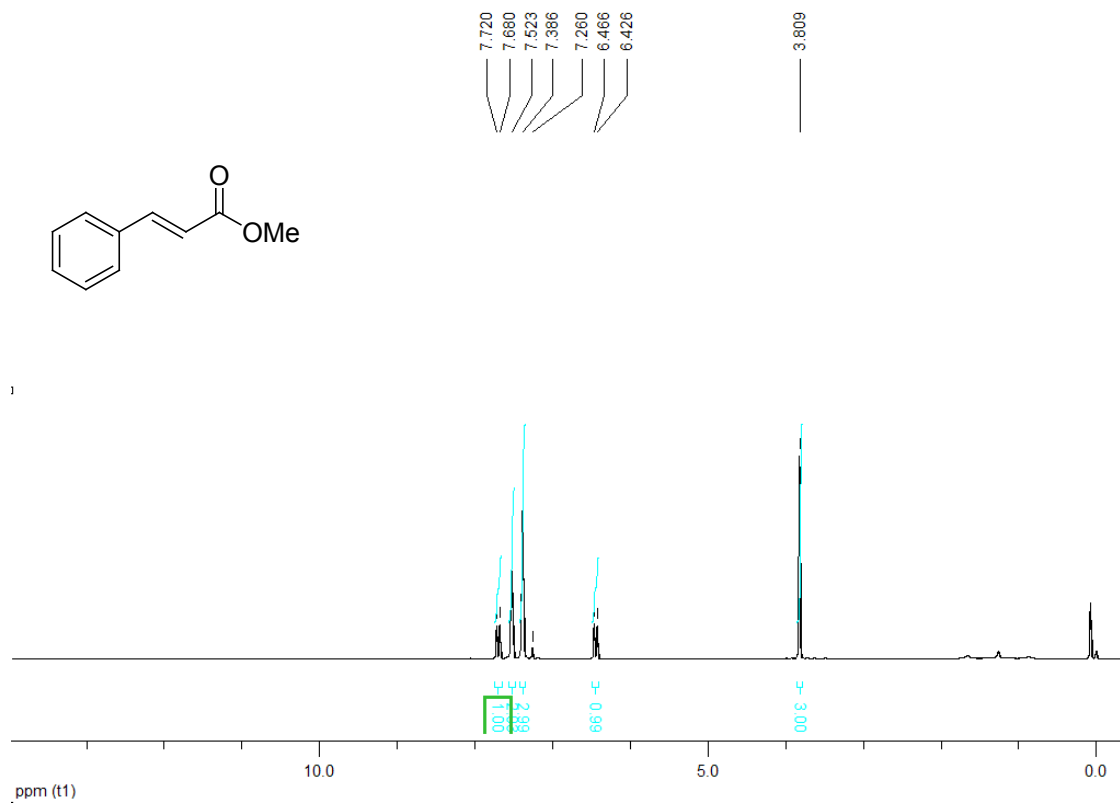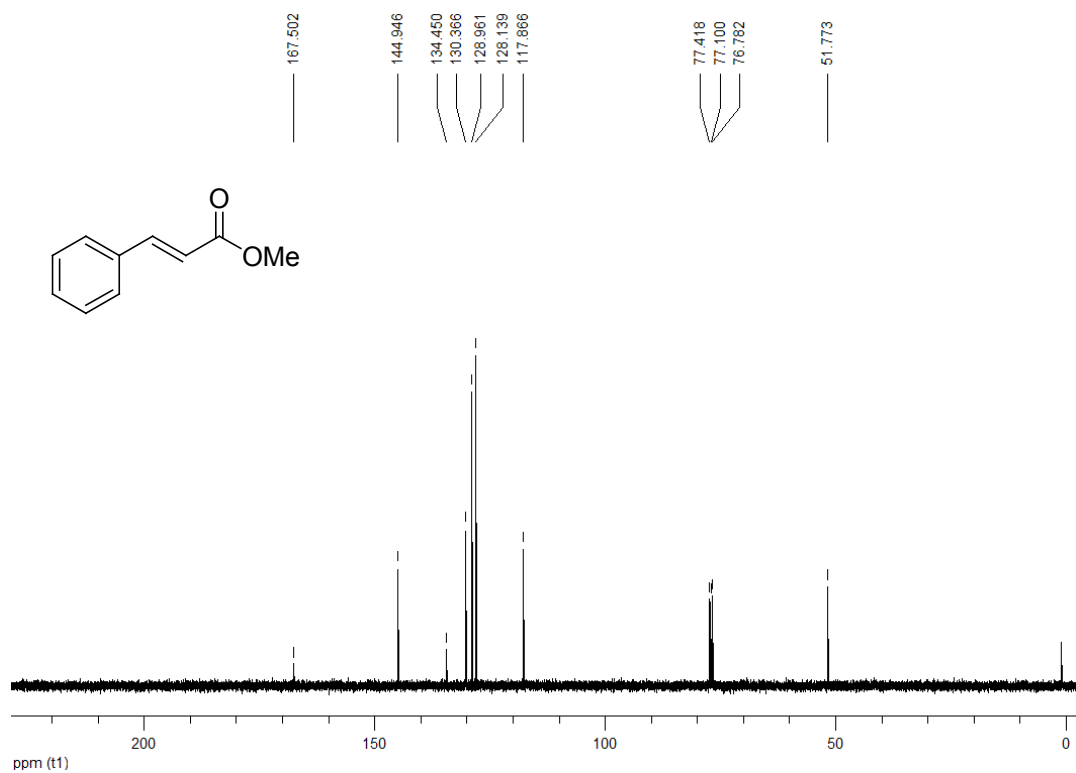

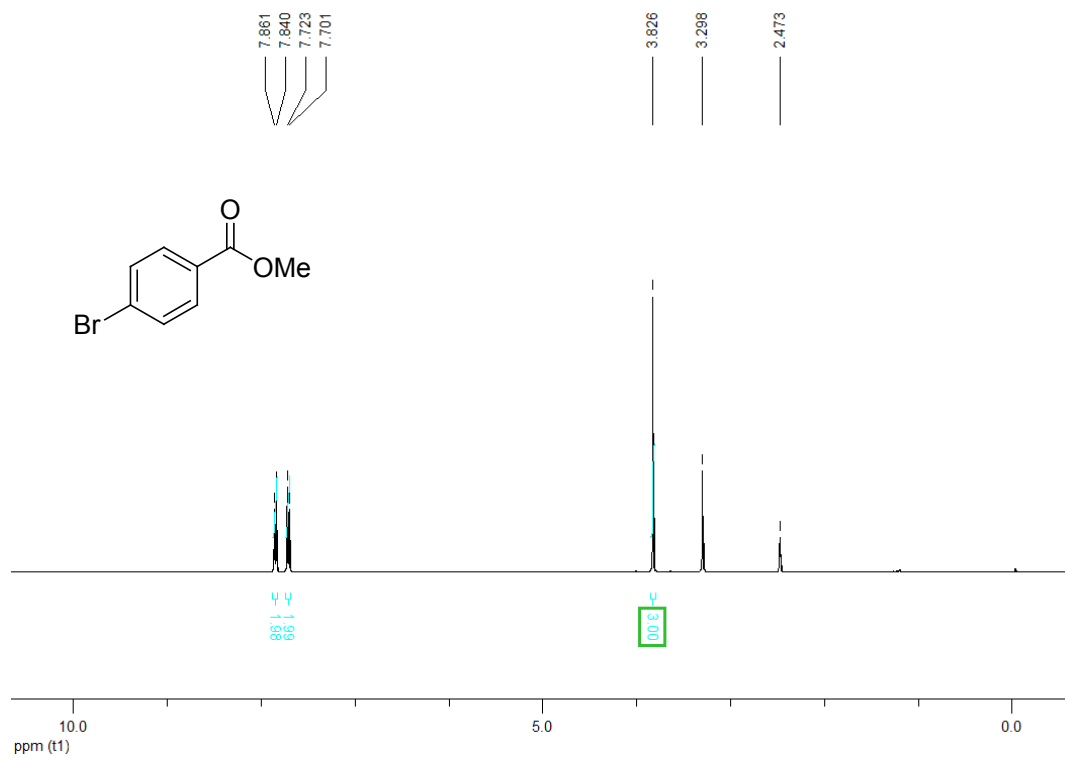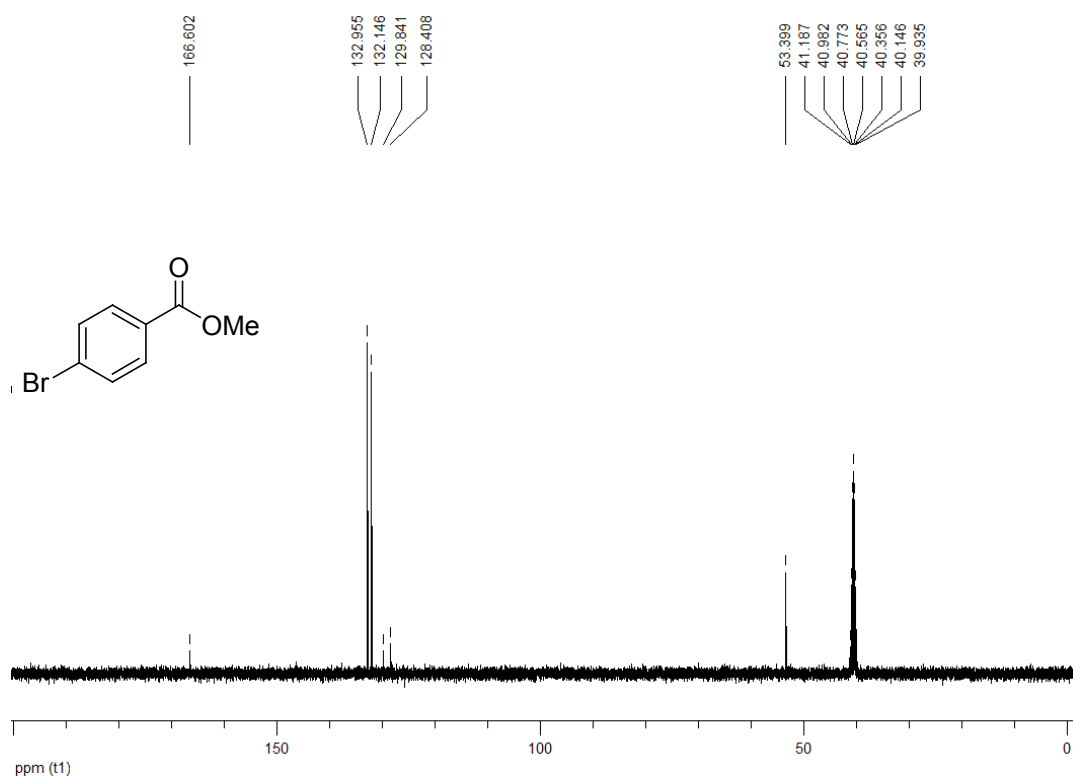

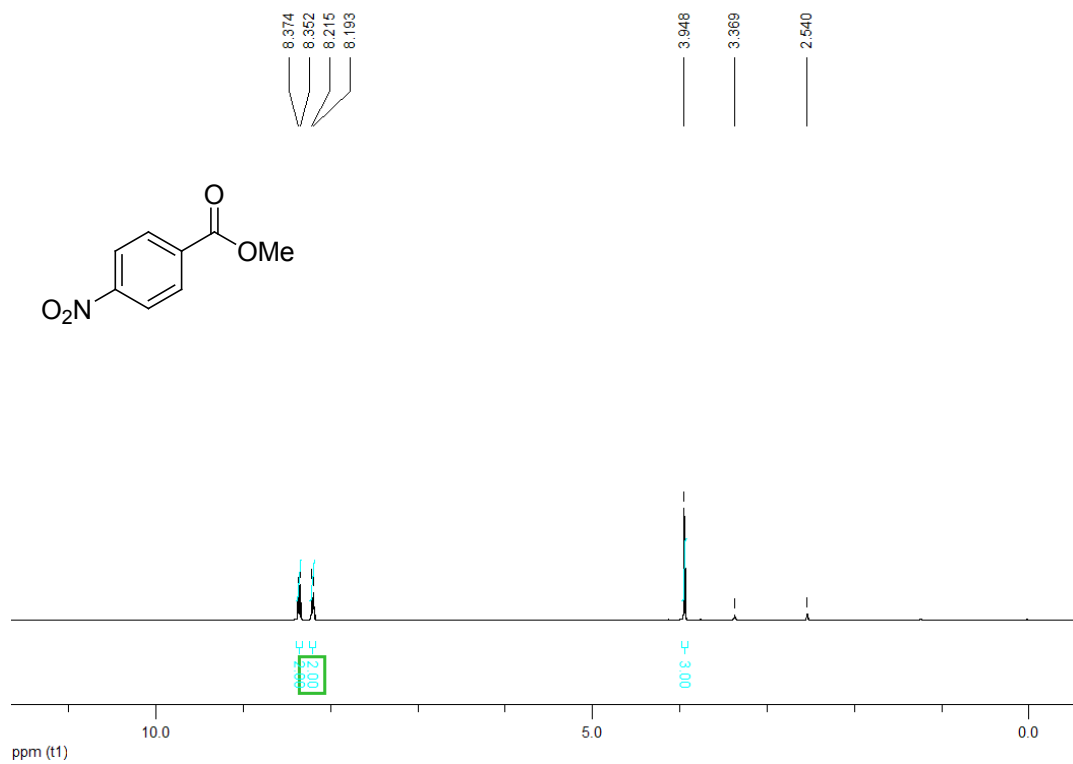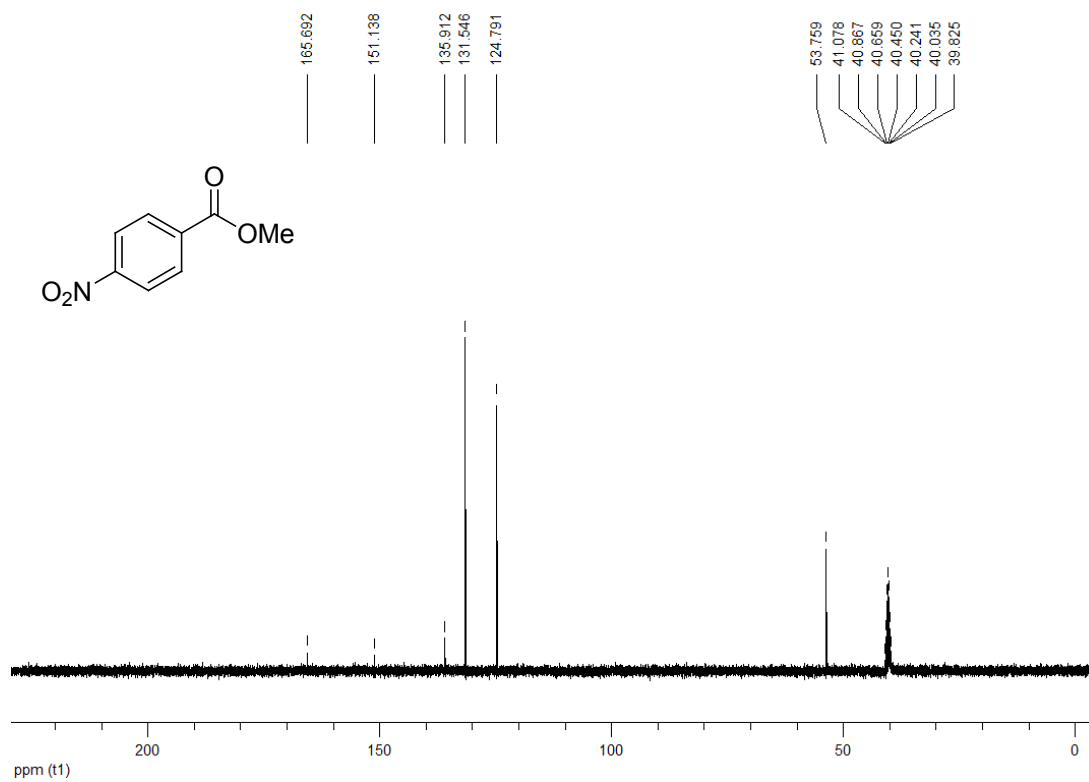

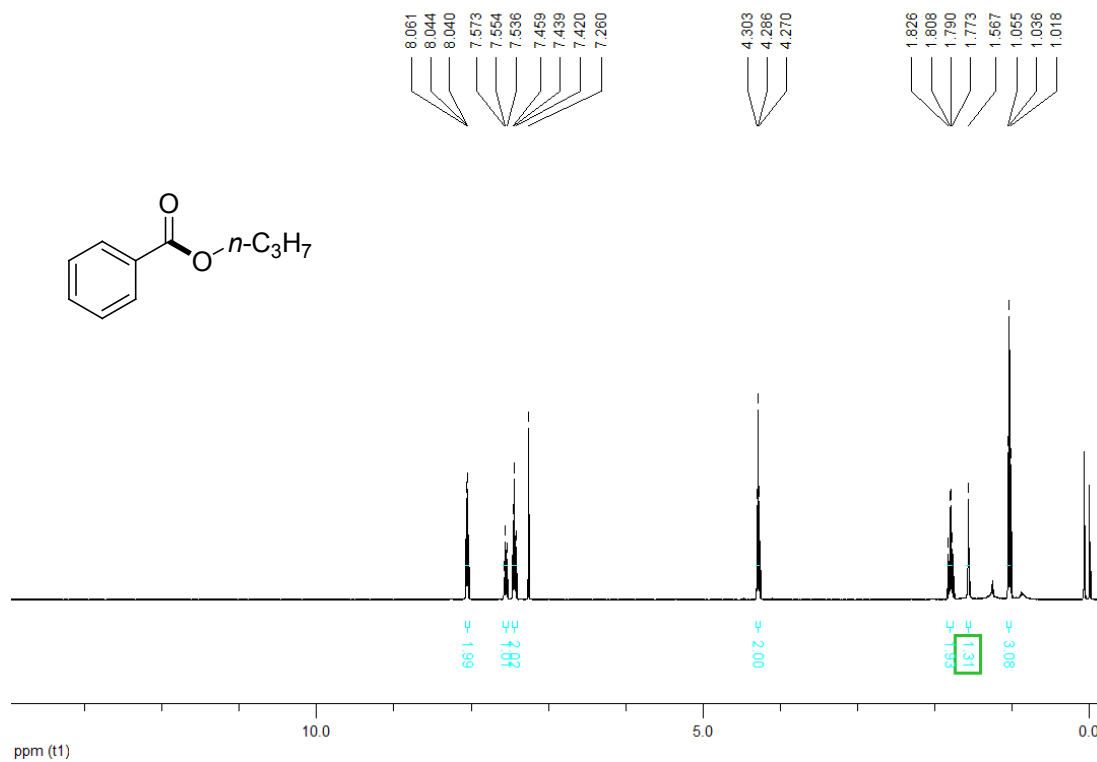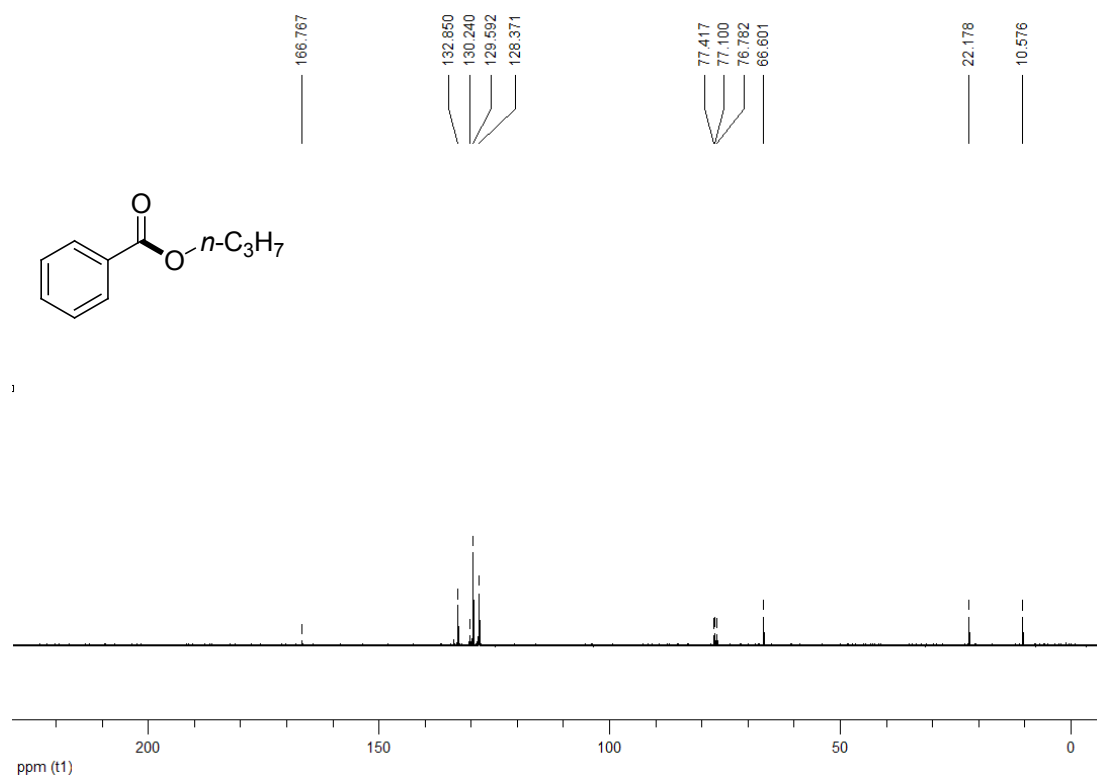

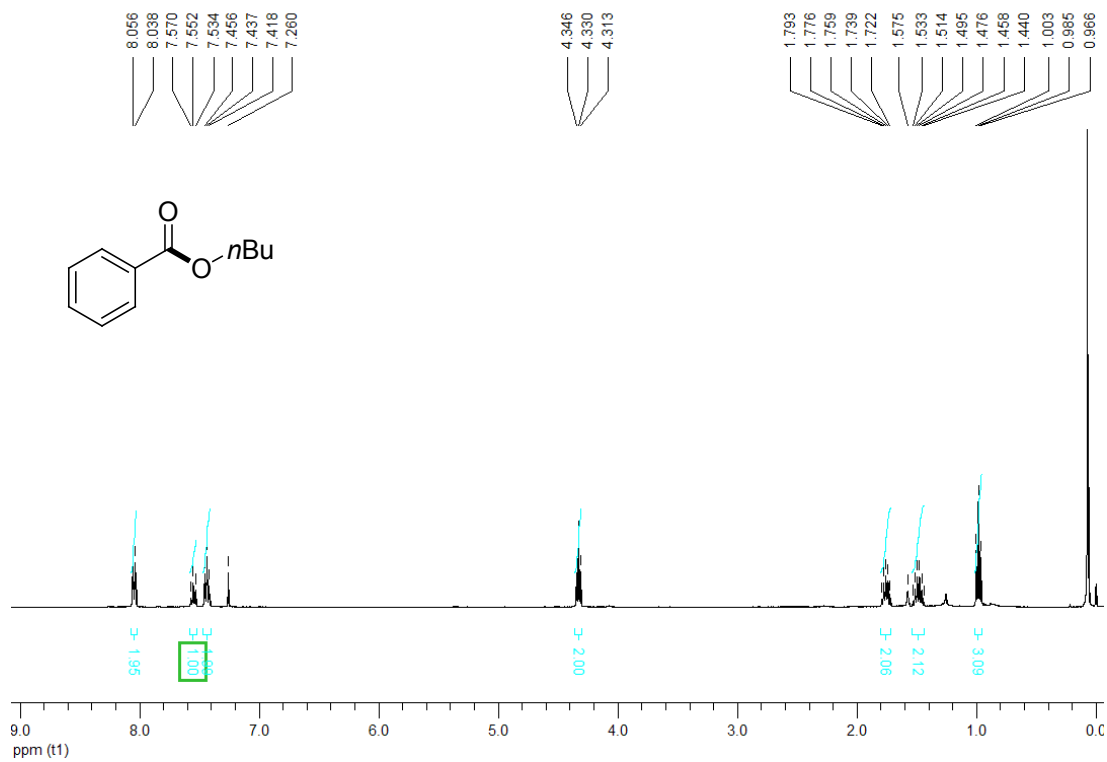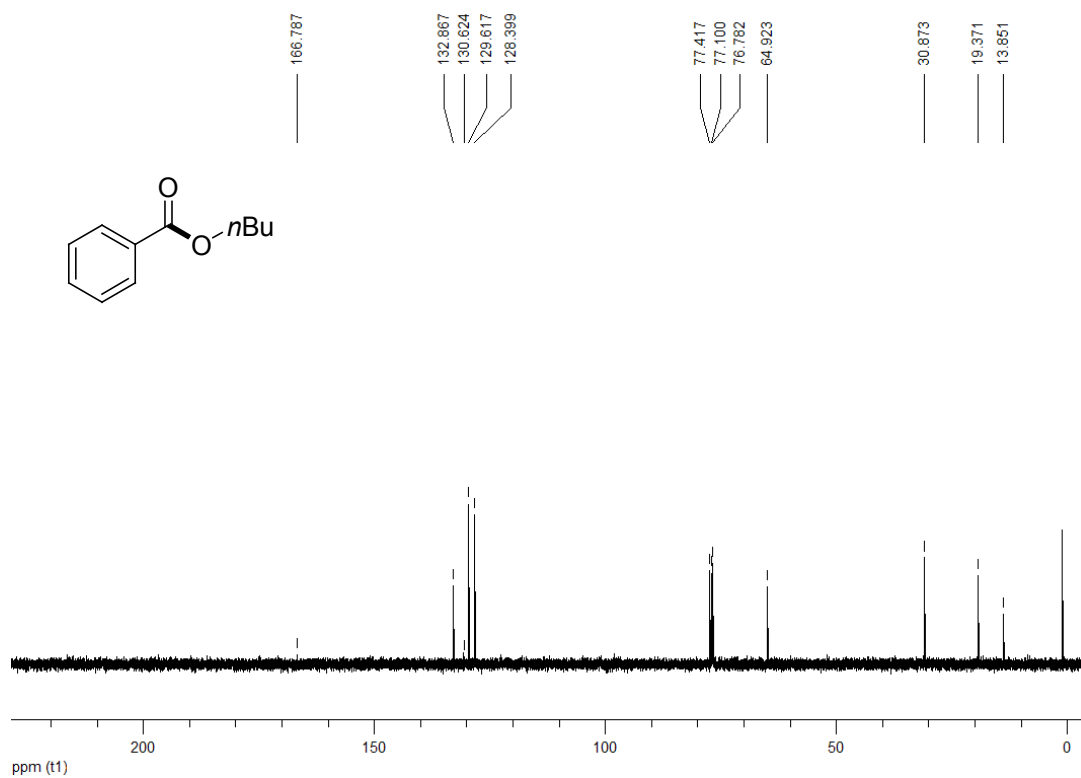

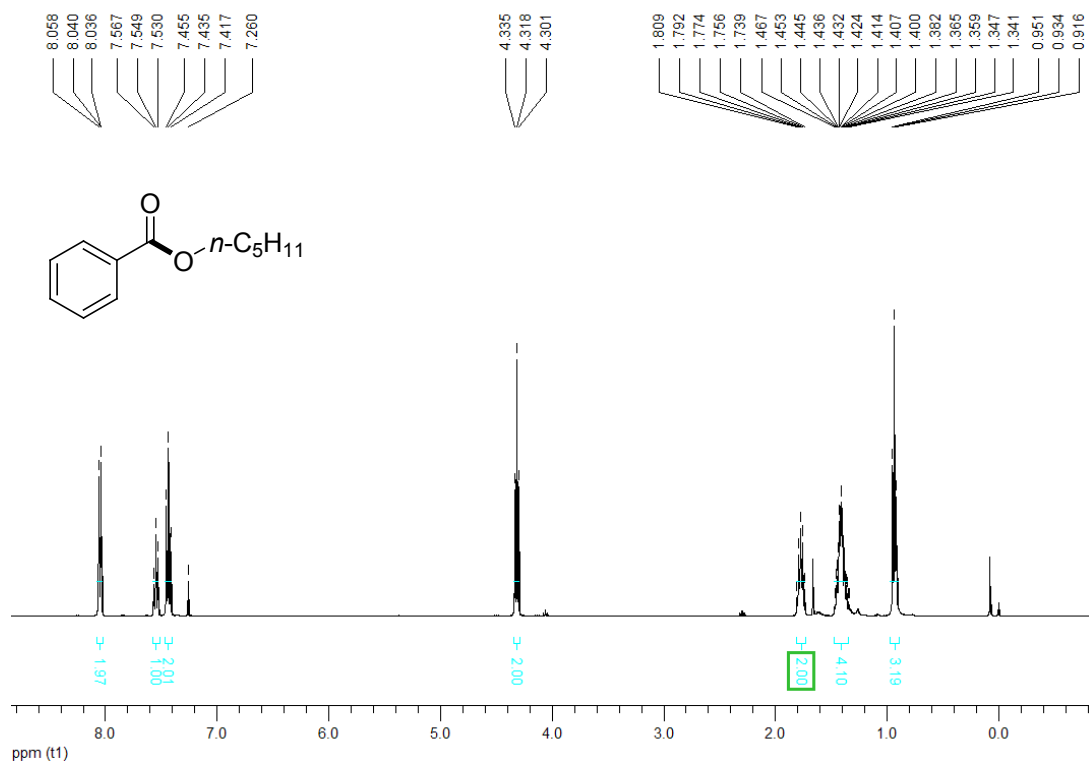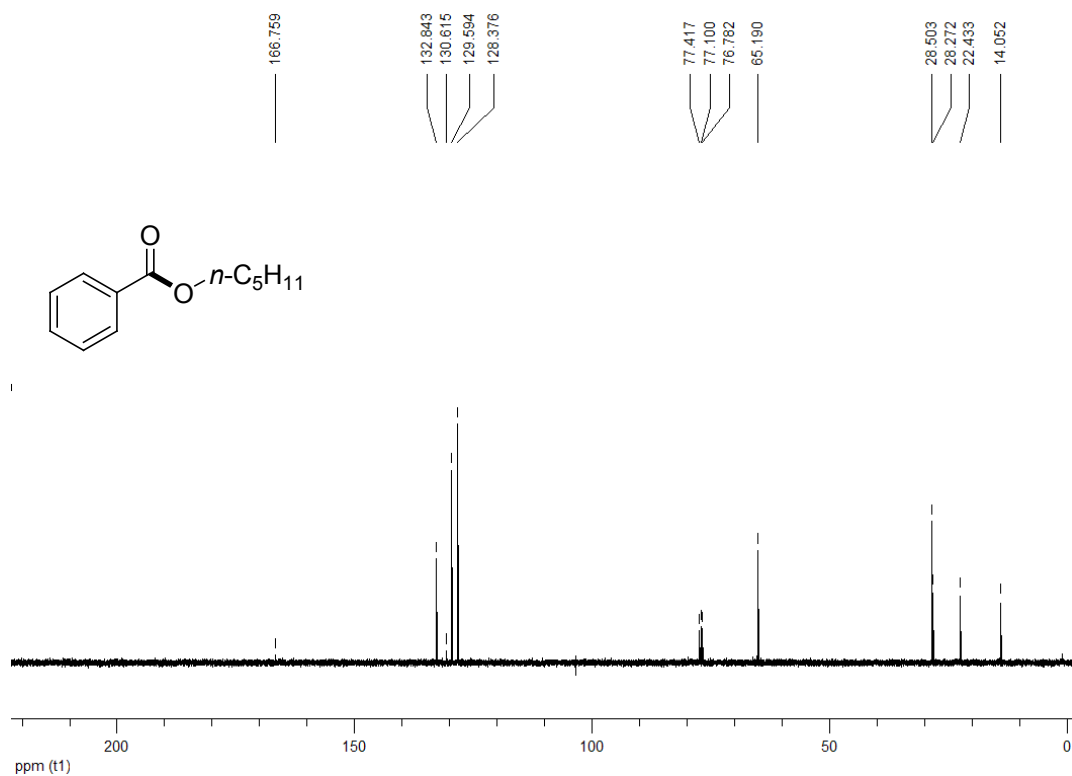

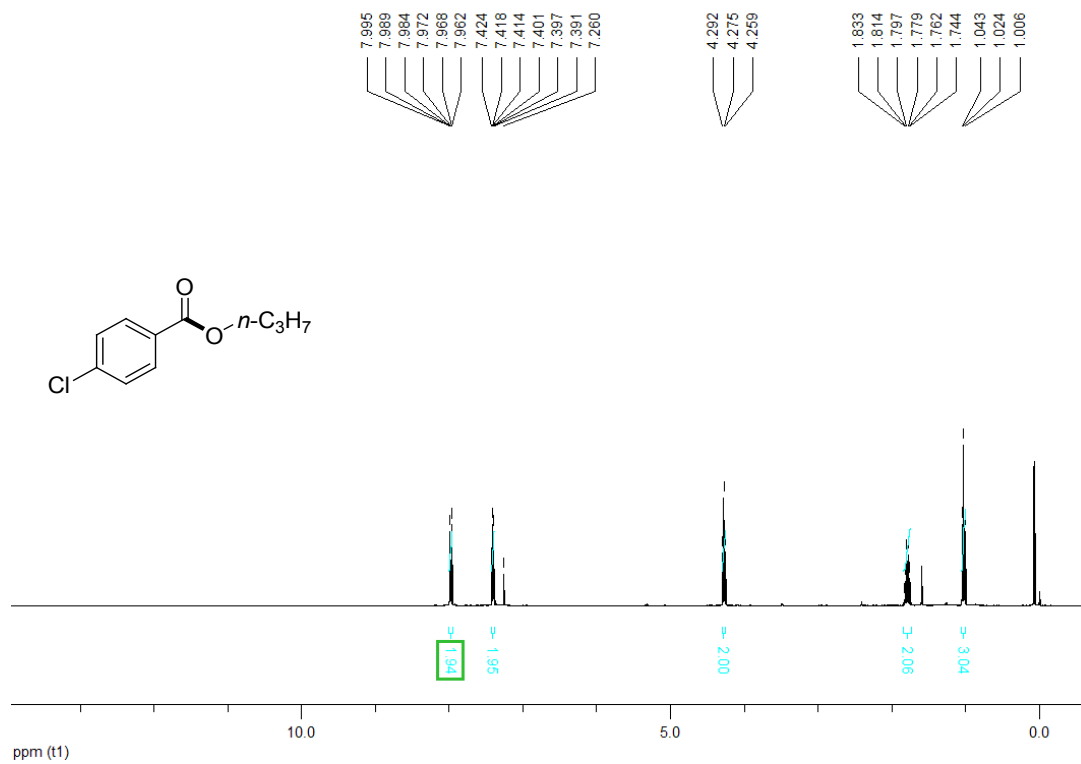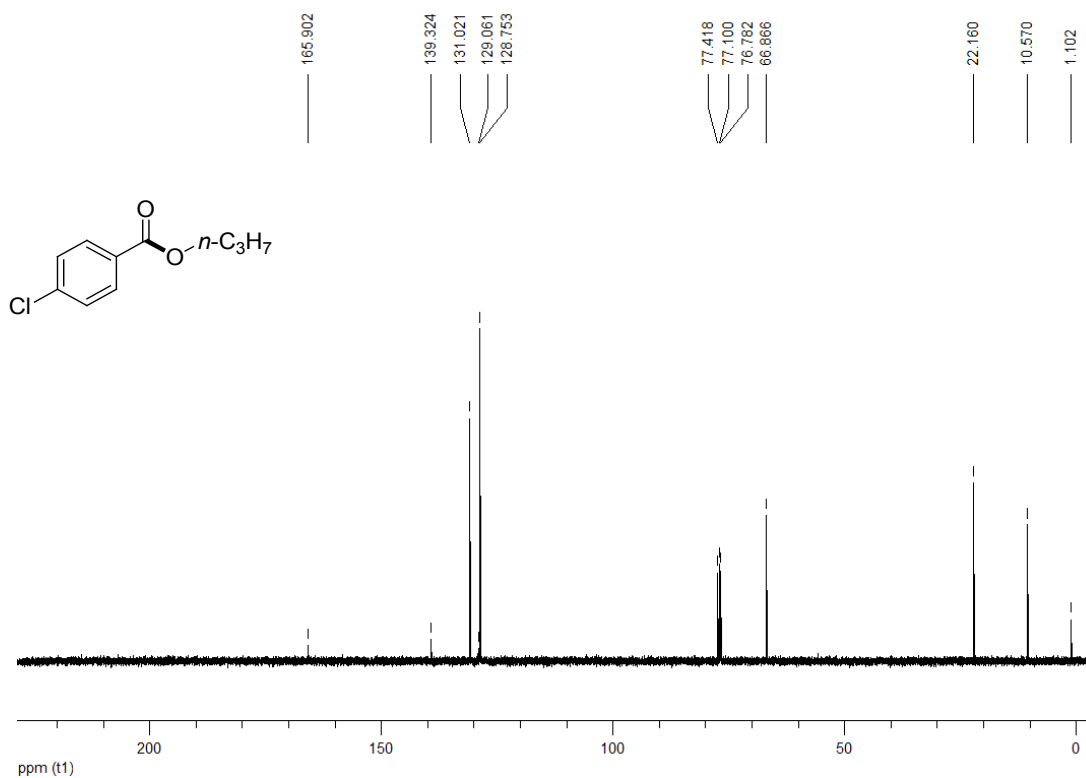

Supplement: c3gc42075b.pdf [file c3gc42075b.pdf]
